# Supplementary material
Source: PubMed Central journal article supplement (PMC7657630)
Supplement: AEM.02080-20-s0001.pdf [file AEM.02080-20-s0001.pdf]

## **Supplemental materials for**

### **Competence-stimulating peptide-dependent localized cell death and extracellular DNA production in *Streptococcus mutans* biofilms**

Ryo Nagasawa<sup>1</sup>, Tatsuya Yamamoto<sup>2</sup>, Andrew S. Utada<sup>2,3</sup>, Nobuhiko Nomura<sup>2,3,\*</sup>,  
Nozomu Obana<sup>3,4,\*</sup>

<sup>1</sup> Graduate School of Life and Environmental Sciences, University of Tsukuba, 1-1-1 Tennodai, Tsukuba, Ibaraki 305-8572, Japan.

<sup>2</sup> Faculty of Life and Environmental Sciences, University of Tsukuba, 1-1-1 Tennodai, Tsukuba, Ibaraki 305-8572, Japan.

<sup>3</sup> Microbiology Research Center for Sustainability, University of Tsukuba, 1-1-1 Tennodai, Tsukuba, Ibaraki 305-8572, Japan.

<sup>4</sup> Faculty of Medicine, Transborder Medical Research Center, University of Tsukuba, 1-1-1 Tennodai, Tsukuba, Ibaraki 305-8577, Japan.

Figure S1-S9

Table S1-S3

Movie S1-S2 legends

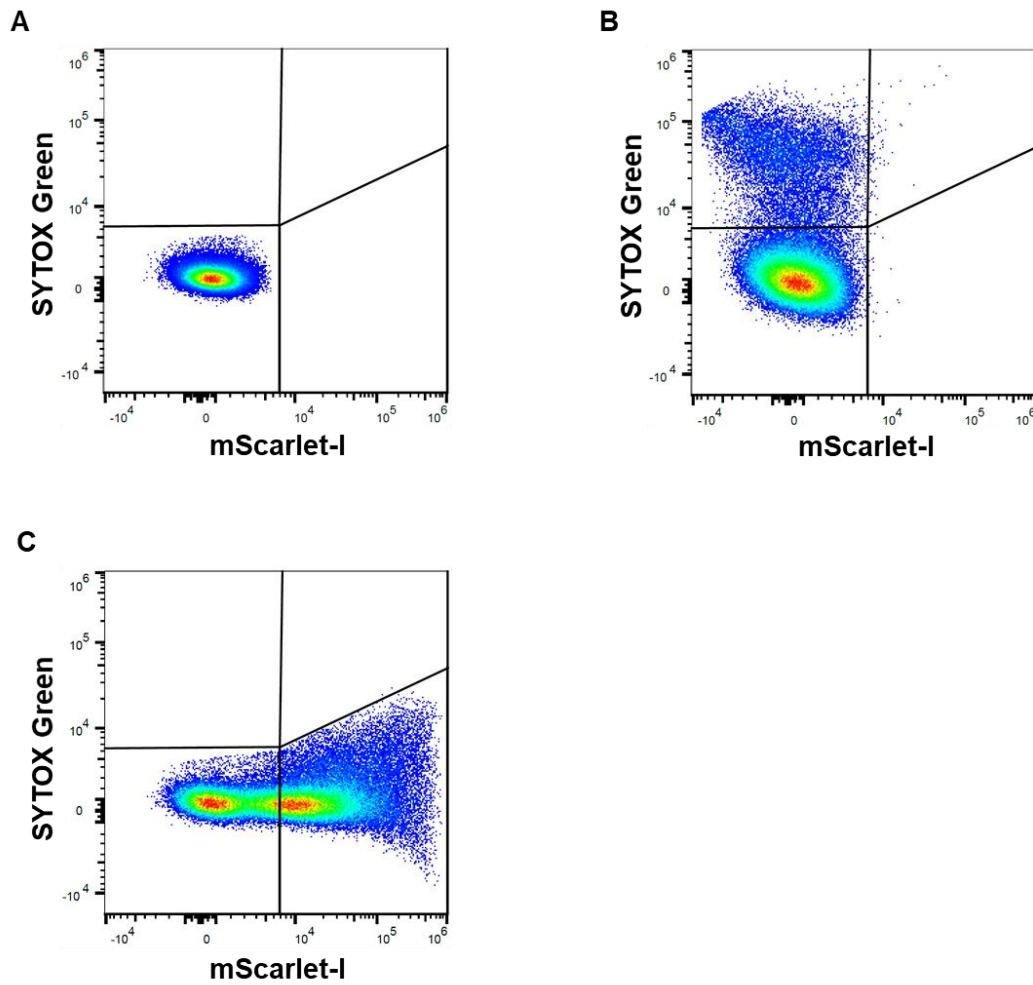

**Fig. S1** Gating for determining the negative or positive fluorescence was set with a nonfluorescent sample and single fluorescent samples. *S. mutans* UA159 WT cells cultured in BHI and BHI with sCSP were used for the nonfluorescent sample (A) and the SYTOX Green fluorescent sample (B), respectively. The  $P_{lytF}$  reporter strain cultured in BHI with sCSP was used for the mScarlet-I fluorescent sample (C). The cells were grown in an aerobic atmosphere containing 5%  $\text{CO}_2$  at  $37^\circ\text{C}$  for 6 h. SYTOX Green fluorescent samples were stained with 500 nM SYTOX Green for 15 min and then subjected to flow cytometry.

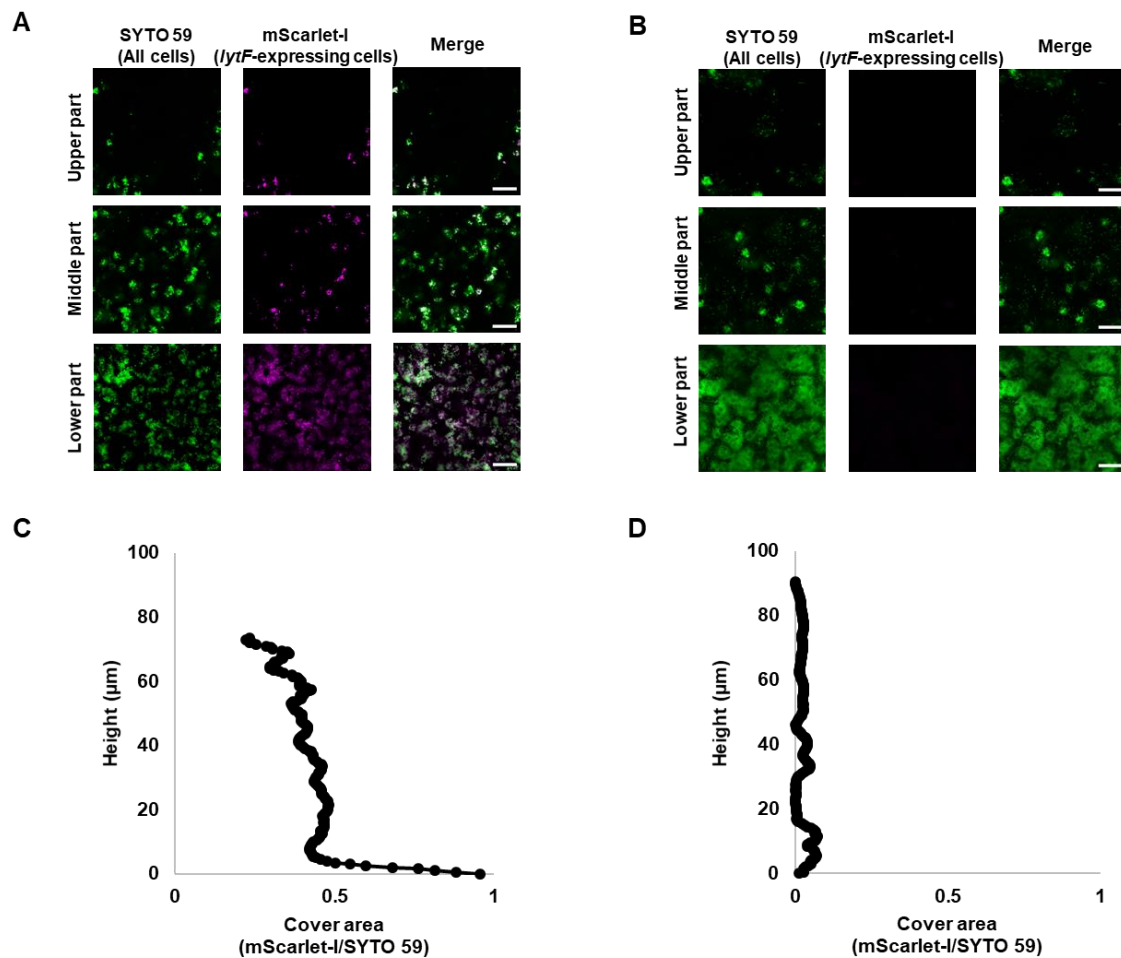

**Fig. S2** *lytF*-expressing cells are abundant near the bottom of the biofilm. The  $P_{lytF}$  reporter strain was grown in BHIs with sCSP (A, C) or BHIs (B, D) in an aerobic atmosphere containing 5%  $\text{CO}_2$  at 37°C for 6 h in a 6-well plate. Nonadherent cells were removed by washing twice with PBS. The biofilm cells were stained with 5  $\mu\text{M}$  SYTO 59 for 30 min and observed with upright CLSM. Z-stacks were acquired at 0.5  $\mu\text{m}$  intervals. (A, B) Distances of 2, 30, and 60  $\mu\text{m}$  from the polystyrene surface were defined as the lower, middle, and upper parts of the biofilm, respectively. SYTO 59 (all cells) and mScarlet-I (*lytF*-expressing cells) are shown in green and magenta, respectively. The scale bars indicate 20  $\mu\text{m}$ . (C, D) In each image of the  $xy$  sections, the cover areas where the fluorescence of mScarlet-I and SYTO 59 were detected were calculated by ImageJ and Fiji. The x-axis shows the mScarlet-I/SYTO 59 ratio of the cover area, and the y-axis shows the height of the biofilm. Representative data from independent experiments are presented.

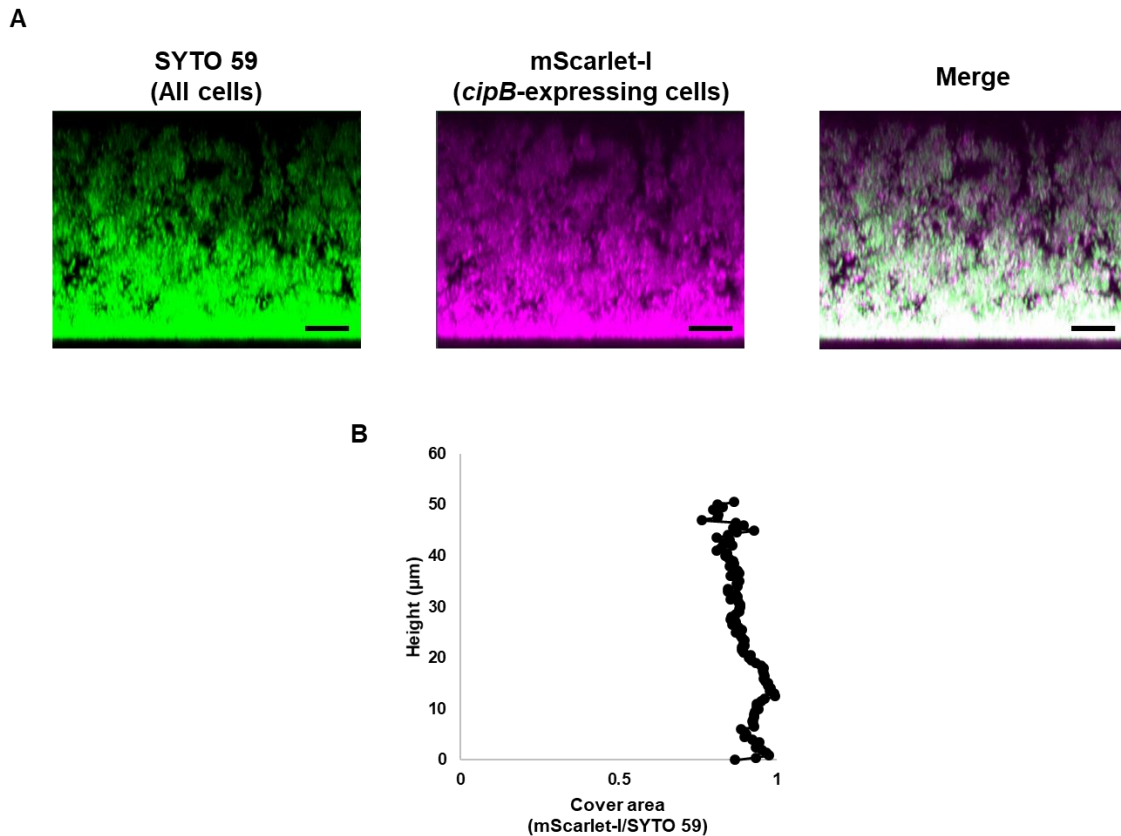

**Fig. S3** Almost all cells in the biofilm captured the sCSP signal. We used the *cipB* promoter as a reporter for CSP capture because *cipB* is one of the genes directly controlled by the two-component regulatory system ComDE that recognizes CSP signals. The  $P_{cipB}$  reporter strain was grown in BHIs with sCSP in an aerobic atmosphere containing 5%  $CO_2$  at 37°C for 6 h in a glass-bottom dish. Nonadherent cells were removed by washing twice with PBS. The biofilm cells were stained with 5  $\mu$ M SYTO 59 for 30 min and observed with inverted CLSM. Z-stacks were acquired at 0.5  $\mu$ m intervals. SYTO 59 (all cells) and mScarlet-I (*lytF*-expressing cells) are shown in green and magenta, respectively. The scale bars indicate 10  $\mu$ m. Representative images from independent experiments are presented.

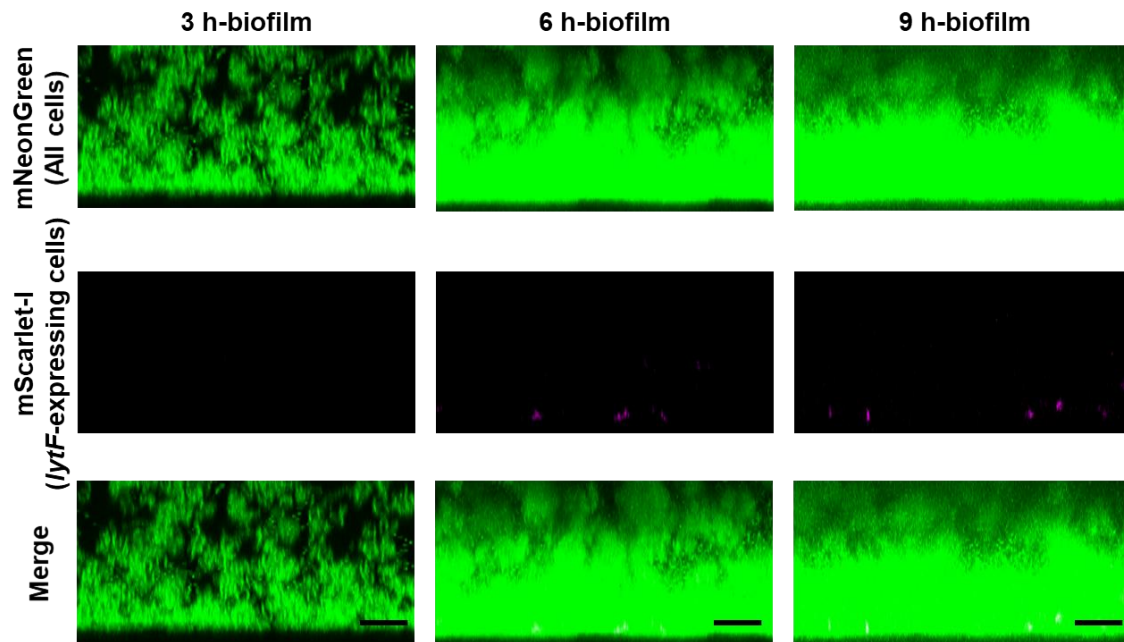

**Fig. S4** *lytF*-expressing cells were observed near the bottom of the 6 h and 9 h biofilms when cultured in the absence of sCSP. The  $P_{ldh} P_{lytF}$  dual-reporter strain was grown in an aerobic atmosphere containing 5%  $\text{CO}_2$  at 37°C in BHIs for 3, 6, or 9 h in glass-bottom dishes. Nonadherent cells were removed by washing twice with PBS. An inverted CLSM was used to make observations at a distance of approximately 40  $\mu\text{m}$  from the surface was observed using an inverted CLSM. Z-stacks were acquired at 0.5  $\mu\text{m}$  intervals. These images show side views of the biofilms. Since the samples for each culture time were individually prepared, these images were not in the same field of view. mNeonGreen (all cells) and mScarlet-I (*lytF*-expressing cells) are shown in green and magenta, respectively. The scale bars indicate 10  $\mu\text{m}$ . Representative images from independent experiments are presented.

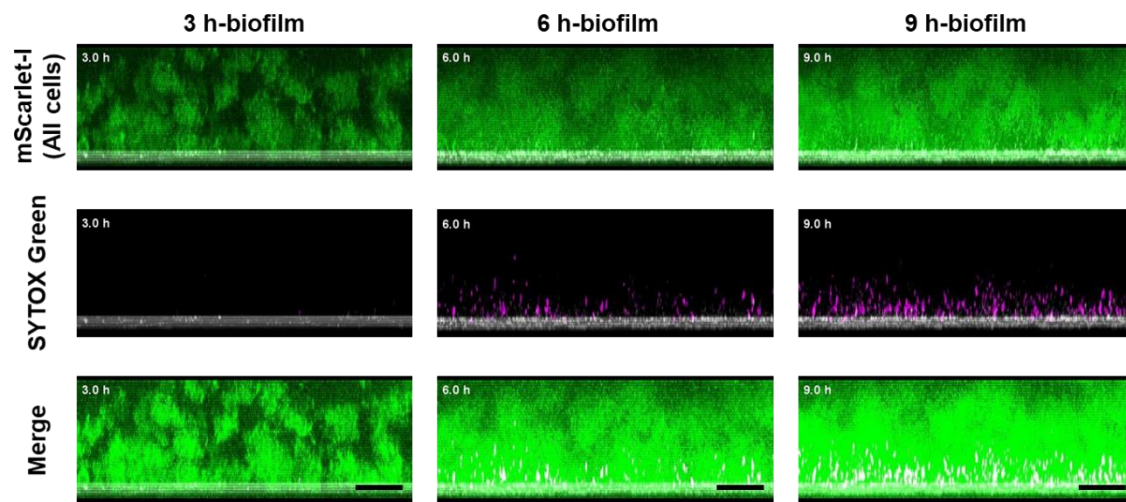

**Fig. S5** Dead cells and eDNA are abundant near the bottom of the biofilm formed in BHIs without sCSP. The  $P_{ldh}$  reporter, a constitutive promoter reporter, was grown in a glass-bottom dish in BHIs at 37°C. The medium was supplemented with 1.25  $\mu$ M SYTOX Green to stain dead cells and extracellular nucleic acids. The same field of view within a range of approximately 40  $\mu$ m from the glass surface was observed at 30 min intervals while culturing at 37°C. Z-stacks were acquired at 0.55  $\mu$ m intervals. These images show side views of the biofilms, and the white line below each image shows the glass surface obtained by reflection. mScarlet-I (all cells) and SYTOX Green (dead cells and extracellular nucleic acids) are shown in green and magenta, respectively. The scale bars indicate 10  $\mu$ m. Representative images from independent experiments are presented.

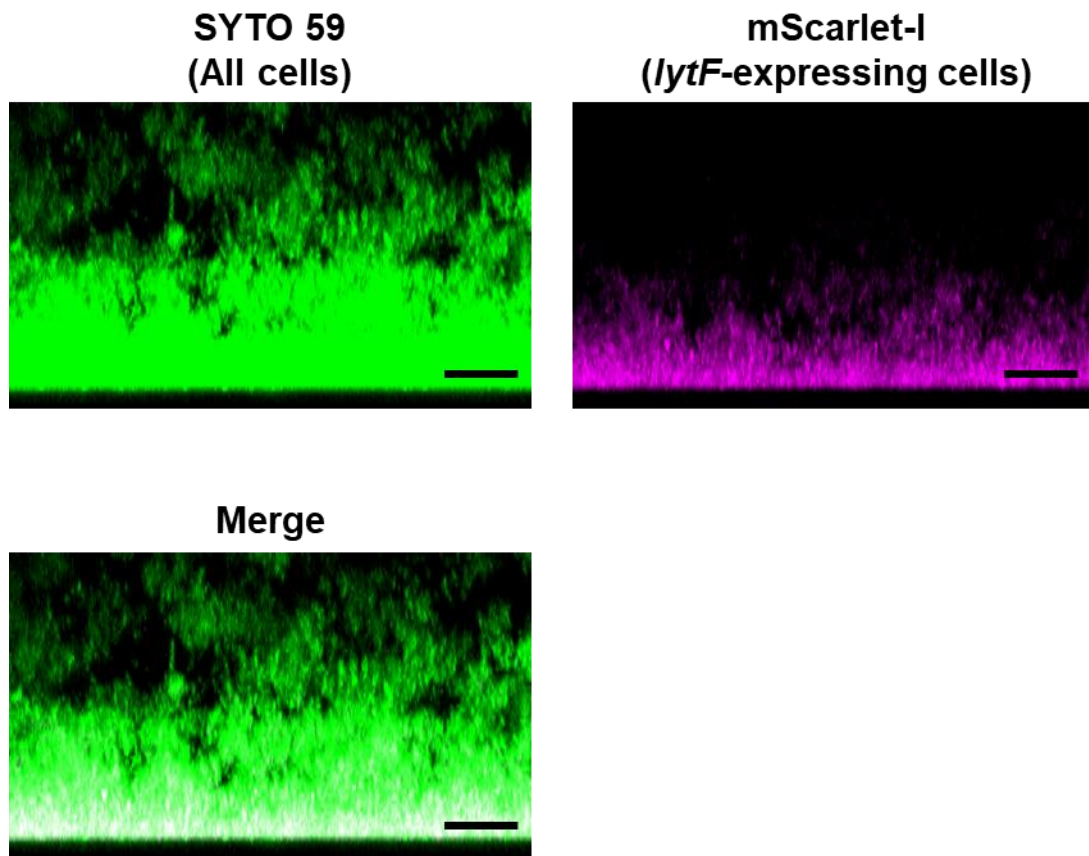

**Fig. S6** *lytF*-expressing cells are abundant near the bottom of the biofilm formed on the saliva-coated glass surface. To examine whether the nature of the biofilm-forming surface affects the distribution of *lytF*-expressing cells within the biofilm, the biofilm formed on the saliva-coated glass surface was observed. A filter-sterilized whole saliva sample was added to a glass-bottom dish and allowed to stand overnight at 4°C. The dish was used after washing twice with sterile PBS. The  $P_{lytF}$  reporter strain was grown in an aerobic atmosphere containing 5% CO<sub>2</sub> at 37°C in BHIs with sCSP for 6 h in a saliva-coated glass-bottom dish. Nonadherent cells were removed by washing twice with PBS. The biofilm cells were stained with 5 μM SYTO 59 for 30 min and observed with inverted CLSM. Z-stacks were acquired at 0.5 μm intervals. These images show side views of the biofilm. SYTO 59 (all cells) and mScarlet-I (*lytF*-expressing cells) are shown in green and magenta, respectively. The scale bars indicate 10 μm. Representative data from independent experiments are presented.



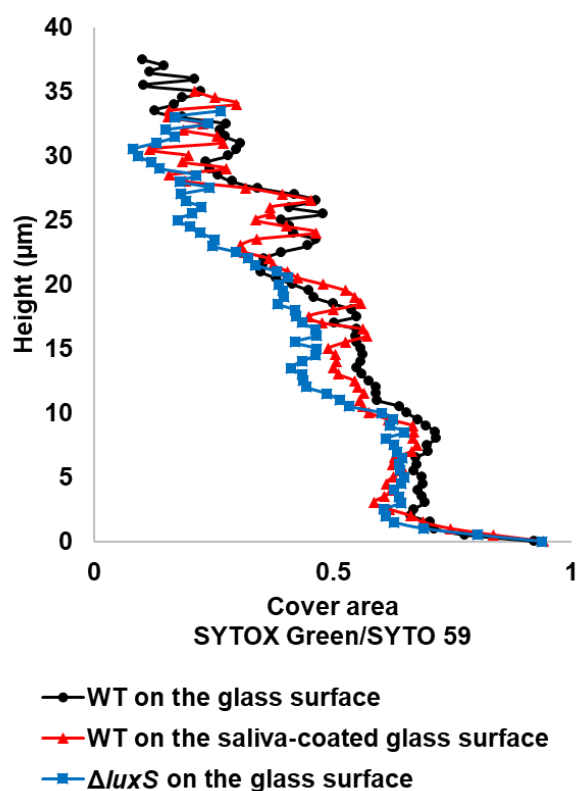

**Fig. S7** Saliva and AI-2-mediated quorum sensing has no effect on the localization of *lytF*-expressing cells in the biofilm. The distributions of *lytF*-expressing cells in the biofilm formed by WT on the glass surface and the saliva-coated glass surface (Fig. S7) and the biofilm formed by  $\Delta luxS$  on the glass surface (Fig. S8) were examined by image analysis. In each two-dimensional image, the cover areas where the fluorescence of mScarlet-I (*lytF*-expressing cells) and SYTO 59 (all cells) were detected were calculated by ImageJ and Fiji.



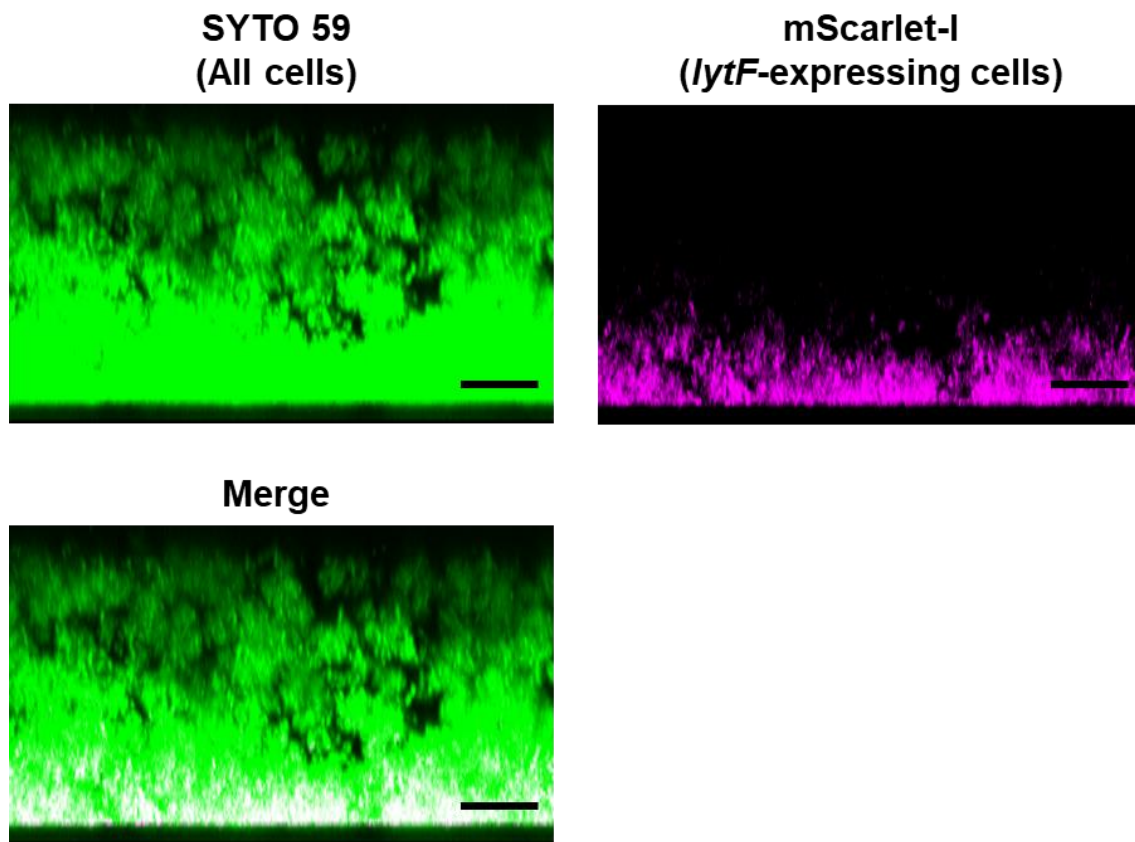

**Fig. S8** *lytF*-expressing cells are abundant near the bottom of the biofilm formed by  $\Delta luxS$ . To investigate whether quorum sensing via AI-2 is involved in the heterogeneous distribution of *lytF*-expressing cells in the biofilm, we analyzed the biofilm of the  $\Delta luxS$  strain that cannot synthesize AI-2. The  $\Delta luxS$   $P_{lytF}$  reporter strain was grown in an aerobic atmosphere containing 5% CO<sub>2</sub> at 37°C in BHIs with sCSP for 6 h. Nonadherent cells were removed by washing twice with PBS. The biofilm cells were stained with 5  $\mu$ M SYTO 59 for 30 min and observed with inverted CLSM. Z-stacks were acquired at 0.5  $\mu$ m intervals. These images show side views of the biofilm. SYTO 59 (all cells) and mScarlet-I (*lytF*-expressing cells) are shown in green and magenta, respectively. The scale bars indicate 10  $\mu$ m. Representative data from independent experiments are presented.

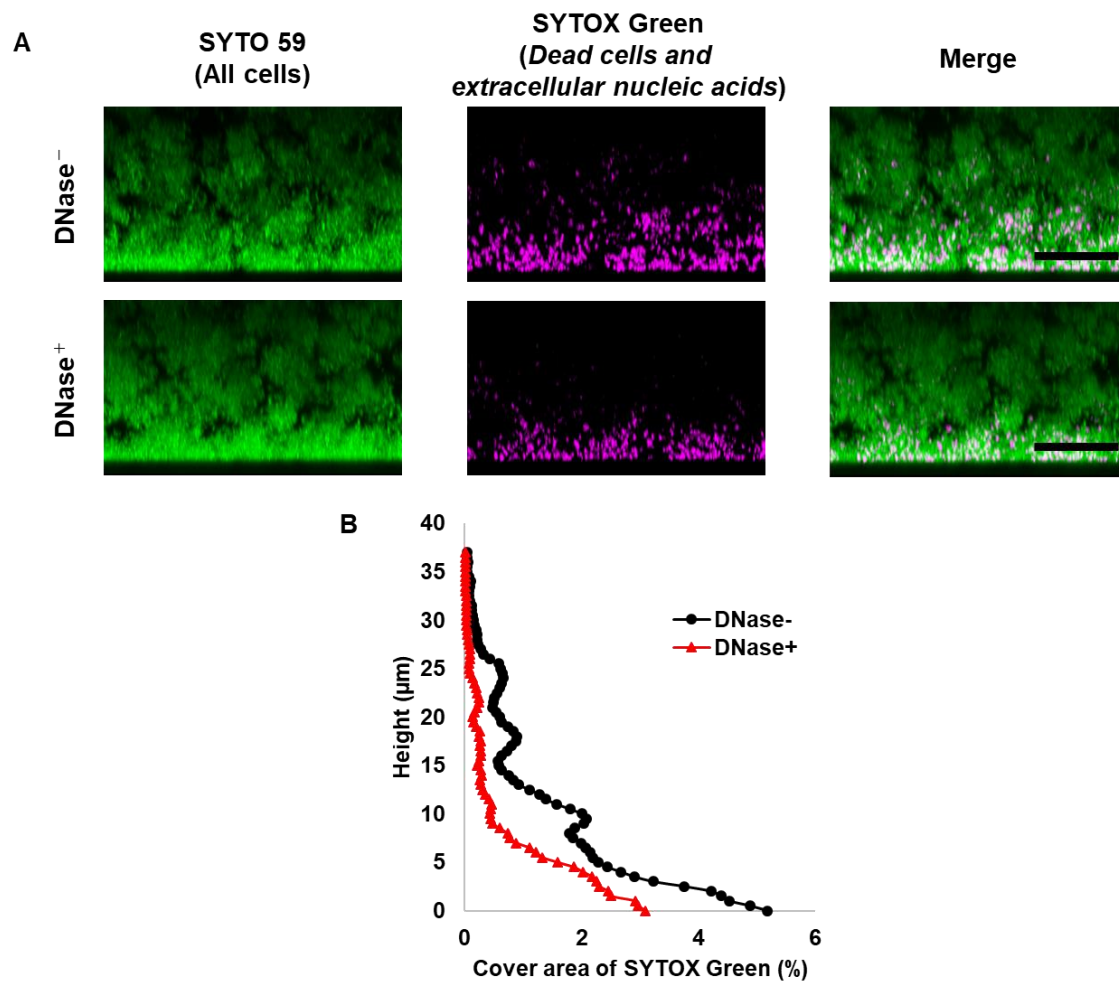

**Fig. S9** The addition of DNase I to the culture medium reduces eDNA in the biofilm. CLSM observations and image analysis were performed to determine whether the addition of DNase I to the culture medium prior to culture initiation reduced the eDNA in the biofilm. The WT strain was cultured in a glass-bottom dish under the same conditions as in Fig. 8B (DNase I<sup>-</sup> and DNase I<sup>+</sup>). The biofilm cells were stained with 5 μM SYTO 59 and 500 μM SYTOX Green for 30 min and observed with inverted CLSM. Z-stacks were acquired at 0.5 μm intervals. (A) SYTO 59 (all cells) and SYTOX Green (eDNA and extracellular nucleic acids) are shown in green and magenta, respectively. The scale bars indicate 20 μm. (B) In each two-dimensional image, the cover area where the fluorescence of SYTOX Green were detected was calculated by ImageJ and Fiji.

Table S1 Primers for mutant construction

| Primer                      | Sequence                                                   |
|-----------------------------|------------------------------------------------------------|
| comDE up Fw                 | CTCAAGGCTTTGATAAATTGATGCC                                  |
| comDE up Rv fuse to ermBP   | CTTTTACGTTTCCGGGTACAATTCCGGTGGTTTCAAGACGTCCTTG             |
| comDE down Fw fuse to ermBP | GAAATAATTCTATGAGTCGCCAATCATCATCATTATTCAAGCAACTCC           |
| comDE down Rv               | GGCAGTAAGGACAACCTTGACTAG                                   |
| cipB up Fw                  | GGTTCAAAATGAGATAATGGCAC                                    |
| cipB up Rv fuse to ermBP    | CTTTTACGTTTCCGGGTACAATTCCGTTAAATTGTTCAAATGCTTGTG           |
| cipB down Fw fuse to ermBP  | GAAATAATTCTATGAGTCGCCGAGGAGCTCTTAATTCCTGTG                 |
| cipB down Rv                | CCATAGGTCACCATATGATTAGATC                                  |
| comR 5                      | GCAGATCTGCCTCGTCTCA                                        |
| comR N5                     | CCCAGTAGTATCGTTGATGCAAC                                    |
| comR N3                     | CAATTCGTAATCATGTCATAGCTGTTTCTTAAACCTTTTCTATAATCTCTGTCTAAAC |
| comR C5                     | GGGAGTGCAGTCGAAGTGGGCAAGTTGAAAGCCTATTGTTAATCTTCTGACATGG    |
| comR C3                     | AAGGTGTGATTTATTAGAAATCACACC                                |
| comR 3                      | CCTGGAAACGGAACCCCTCCA                                      |
| comS 5                      | CAACCTATGGCGACCAACAAAG                                     |
| comS N5                     | CCTGAAGAAGAACAATTGATTATTGATGGC                             |
| comS N3                     | CAATTCGTAATCATGTCATAGCTGTTTCTCCTGTTATTCTCCTTTCTTTTTGATATCA |
| comS C5                     | GGGAGTGCAGTCGAAGTGGGCAAGTTGAAATAATAGACAGCCCTTATGTCAGATG    |
| comS C3                     | GCAGATGTAGACTTTGACCATGTTG                                  |
| comS 3                      | AAACAAGCTTATATTGCTGCGATTG                                  |
| comX 5                      | TTCCGGCATAGCTCAGTTGG                                       |
| comX N5                     | AATGAAGCATCTTTACCTAGGTGC                                   |
| comX N3                     | CAATTCGTAATCATGTCATAGCTGTTTCTTCTTCCATCTATTACGATGACCTCC     |
| comX C5                     | GGGAGTGCAGTCGAAGTGGGCAAGTTGAAAGGCAAAGTATGCTGAAAGATTACG     |
| comX C3                     | CACTTCCAATTTCAAACCAACATCAATTAG                             |
| comX 3                      | AGGTTCTACAATTTACCTTTACCTGA                                 |
| lytF up Fw                  | GTGTAGAAGAAGAGGGTTATTATCATG                                |
| lytF up Rv fuse to ermBP    | CTTTTACGTTTCCGGGTACAATTCCTCAATCGAAATCTCCTTTATTCTTTTTTAC    |
| lytF up Rv fuse to spc      | GCCAGTCACGTTACGTTATTAGCTCAATCGAAATCTCCTTTATTCTTTTTTAC      |
| lytF down Fw fuse to ermBP  | GAAATAATTCTATGAGTCGCTTATATTTATCCTGACTAAGAGAACAAAAC         |
| lytF down Fw fuse to spc    | GATAAAATCCGATTAAGATACTGCCTACTTATATTTATCCTGACTAAGAGAACAAAAC |
| lytF down Rv                | CTGAAAAACAGAGCAAGCTAAC                                     |
| gtfB up Fw                  | CATGAAACCAGTTGGTCTGGAATAC                                  |

|                            |                                                  |
|----------------------------|--------------------------------------------------|
| gtfB up Rv fuse to ermBP   | CTTTTACGTTTCCGGGTACAATTCCACTTTCTTGTCATTAGGAACCTC |
| gtfB down Fw fuse to ermBP | GAAATAATTCTATGAGTCGCGGAGAACGAGTTCGGATTAACATAATTG |
| gtfB down Rv               | CGAAGTTTGCAGCATCTGACTATAG                        |
| ermBP Fw                   | AGGAAACAGCTATGACATG                              |
| ermBP Rv                   | TTTCAACTTGCCCACTTCGAC                            |
| ermBP Fw 2                 | GAATTGTACCCGAAACGTAAAAG                          |
| ermBP Rv 2                 | GCGACTCATAGAATTATTCCTCC                          |
| spec Fw                    | CTAATAACGTAACGTGACTGGCAAG                        |
| spec Rv                    | GTAGGCAGTATCTTAATCGGATTTTATCG                    |

---

Table S2 Primers for promoter reporter construction

| Primer                      | Sequence                                                               |
|-----------------------------|------------------------------------------------------------------------|
| SMU438c 5                   | CAAAACGCTTGGCTAAACTAGG                                                 |
| SMU438c C3-<br>TadhE        | CGAGAGGCAAAAAAAGCCCGCATAAGCGGGCCTGACTGCTAAACCCTCAATCGGAGTTCTCT         |
| SMU436c C5                  | TGAATTGTTTTAGTACCTAGTTAAGCTCGCTCGTTCAACC                               |
| SMU436c 3                   | CCAATGCCATTATGATGGCAAG                                                 |
| Pldh-TadhE Fw               | CCGCTTATGCGGGCTTTTTTGCCTCTCGAAGAGCCCGAGCAACAATAAC                      |
| Pldh-mScarlet Rv            | CTCTTTAATAACAGCTTCACCTTTAGATACCATGTTCTAAACATCTCCTTA                    |
| mScarlet-Cp Fw              | ATGGTATCTAAAGGTGAAGCTGTTA                                              |
| mScarlet-Cp-<br>Tldh Rv     | AAGCATTACACAATGCTTGGTATTTTTATGGATTTTTATTGTTACTTATAAAGTTCATCCATCCCTCCA  |
| KanR-Tldh Fw                | TCCATAAAAATACCAAGCATTGTGTAATGCTTGGTATTTTTATTAAACGTTGAGGAGGCAGATTGCCTTG |
| kanR- SMU436c<br>Rv         | AACGAGCGAGCTTAACTAGGTACTAAAACAATTCATCCAG                               |
| SMU_438c N5                 | AACCTCCTTGAAAAGCCAATGA                                                 |
| SMU436c C3                  | GGTATAGATGAAGTTTGC GGTC                                                |
| SMU438c N5-2                | AAGCACTTGAAAAATCGGAACG                                                 |
| SMU436c C3-2                | AAATAAAAGAAGGACACCTAGCAG                                               |
| PlytF-TadhE Fw              | CCCGCTTATGCGGGCTTTTTTGCCTCTCGGTGCATGGGAGGAATAGTAC                      |
| PlytF-mScarlet<br>Rv        | CTCTTTAATAACAGCTTCACCTTTAGATACCATTCTCAATCGAAATCTCCT                    |
| 1405 up Fw                  | CAGAAGAAATGGGCAAGGTAGATG                                               |
| 1405 up Rv fuse<br>to PcomS | CAAACCACTAACAGTTAAGCAGGATAAATAGTGTGGCCAGCAAGAG                         |
| PcomS Fw fuse<br>to 1405 up | CCTCTTGCTGGCCAACACTATTTATCCTGCTTAACTGTTAGTGGTTTG                       |
| PcomS Rv fuse to<br>mNeon   | CATATTATCCTCTTCACCTTTTGAACCATCCTGTTATTCTCCTTTCTTTTGATATC               |
| mNeon Fw fuse<br>to PcomS   | CAAAAAGAAAGGAGAATAACAGGATGGTTTCAAAGGTGAAGAGGATAATATGG                  |
| 1405 down Rv                | CCGATTGCTATTGCCATCATCAATG                                              |
| 1405_rspD-term<br>1         | GAGCGTGAAGATTTTCTAAGTAATCGTTTTAAAAACCCCT                               |
| 1405_rpsD-term<br>2         | AGGGGTTTTTAAAAACGATTACTTAGAAAATCTTCACGCTC                              |

spoVG-term\_erm TTTCAAACCTTAGTTGCACTCCAGGAAACAGCTATGACATG  
1  
spoVG-term\_erm CATGTCATAGCTGTTTCCTGGAGTGCAACTAAGTTTGAAA  
2  
erm\_1405 1 TCGAAGTGGGCAAGTTGAAAAAAGCAACGTACCTTTGACA  
erm\_1405 2 TGTCAAAGGTACGTTGCTTTTTTCAACTTGCCCACTTCGA  
smu\_1405 F 1 AAAACCTTACTCTATTGGACTTGATATTGG  
smu\_1405 F 2 TGTTGTGACAGATGACTACAAAGTTCCTGC  
smu\_1405 F 3 CTGGGAAATACAGATAAAAGTCATATCGAG  
smu\_1405 R 1 AACCGGATGTTCTTTAAGAATTTGACTTCC  
smu\_1405 R 2 AACCTTTCAAACGTTGCTGTGAATTTGCTC  
smu\_1405 R 3 ATTTTCAGGTTGATGTCCATAATTTGAC  
rspDterm\_Pldh\_1 CTCTTGCTGGCCAACACTATTTAAAGAGCCCGAGCAACAATAA  
rspDterm\_Pldh\_2 TTATTGTTGCTCGGGCTCTTTAAATAGTGTGGCCAGCAAGAG

---

Table S3 Primers for construction of complemented strain

| Primer                  | Sequence                                                    |
|-------------------------|-------------------------------------------------------------|
| 437 up Fw               | GTGAAGCTGTTGTTCCAGATTTG                                     |
| 437 up Rv fuse to PlytF | GTACTATTCCTCCCATGCACCGAGAGGCCAAAAAAGCCC                     |
| lytF Fw fuse to 437 up  | GCGGGCTTTTTTGCCTCTCGGTGCATGGGAGGAATAGTACTTTTTG              |
| lytF Rv fuse to Km      | ATGGATTTTTATTGTTTATTAGTCAGGATAAATAAGTTAATCTTCCC             |
| Km-437 Fw fuse to lytF  | GATTA ACTTATATTTATCCTGACTAATAACAATAAAAAATCCATAAAAAATACCAAGC |
| 437 down Rv             | GGTATAGATGAAGTTTGCGGTC                                      |



**Movie S1** A subpopulation of cells releases nucleic acids into the extracellular environment in response to sCSP. We inoculated WT cells in the exponential phase into a microfluidic device and grew them two-dimensionally at 37°C in BHI (A) or BHI with sCSP (B) in flow cell conditions. SYTOX Green (1.25  $\mu$ M) was added to the media to visualize dead cells and extracellular nucleic acids. The media flowed from left to right in these movies at a constant rate (150  $\mu$ L/h). We observed the cell morphology by bright-field microscopy and acquired images every 10 min for a total of 18 h. Green indicates dead cells and extracellular nucleic acids.

**Movie S2** Dead cells and eDNA are also abundant near the bottom of the biofilm. The *Pldh* reporter strain was grown in glass-bottom dishes in BHIs with sCSP (A) or BHIs (B). The media was supplemented with 1.25  $\mu$ M SYTOX Green to stain dead cells and extracellular nucleic acids. The same field of view within a range of approximately 40  $\mu$ m from the glass surface was observed at 30 min intervals while culturing at 37°C. Z-stacks were acquired at 0.55  $\mu$ m intervals. These images show side views of the biofilms, and the white line below each image shows the glass surface obtained by reflection. mScarlet-I (all cells) and SYTOX Green (dead cells and extracellular nucleic acids) are shown in green and magenta, respectively. The scale bars indicate 10  $\mu$ m. Representative images from independent experiments are presented.
